# Supplementary material
Source: publisher figshare collection journal article supplement (https://tandf.figshare.com/articles/dataset/_/4981895)
Supplement: Supplementary file 2 [file 1]

### **Search strategy**

OVID MEDLINE (2006 – 20<sup>th</sup> November 2016)

1. exp Pregnancy, Twin/ (1180)
2. exp Pregnancy, Multiple/ (3271)
3. exp Premature birth/(9991)
4. exp Pessaries/ (348)
5. exp Cervix Uteri/( 6418)
6. 1 OR 2 (3271)
7. 3 AND 4 AND 5 (29)
8. 6 AND 7 (9)

OVID EBMR Cochrane Central Register of Controlled Trial (2006 – 20<sup>th</sup> November 2016)

1. exp Pregnancy, Twin/ (22)
2. exp Pregnancy, Multiple/ (79)
3. exp Premature birth/(318)
4. exp Pessaries/ (38)
5. exp Cervix Uteri/( 258)
6. 1 OR 2 (79)
7. 3 AND 4 AND 5 (7)
8. 6 AND 7 (4)
